# Supplementary material
Source: Springer Nature journal article supplement (https://www.springermedizin.de/resource/supplementary/12943_2013_1510_MOESM5_ESM.pdf/9552302)

**A****Normal epithelium**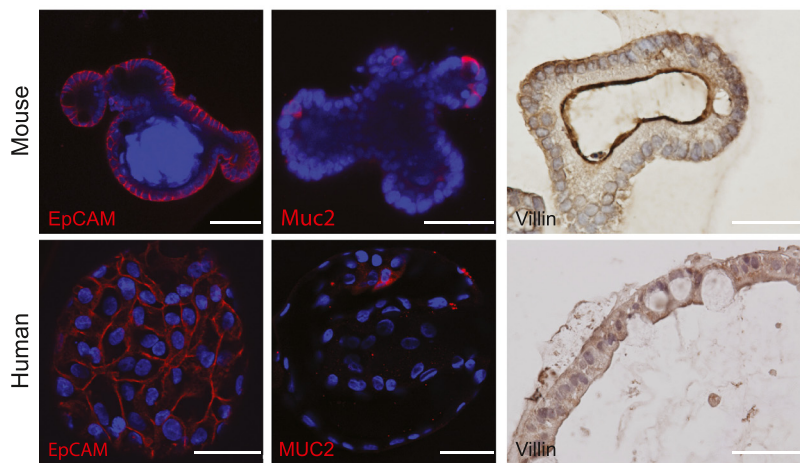**B****Adenoma**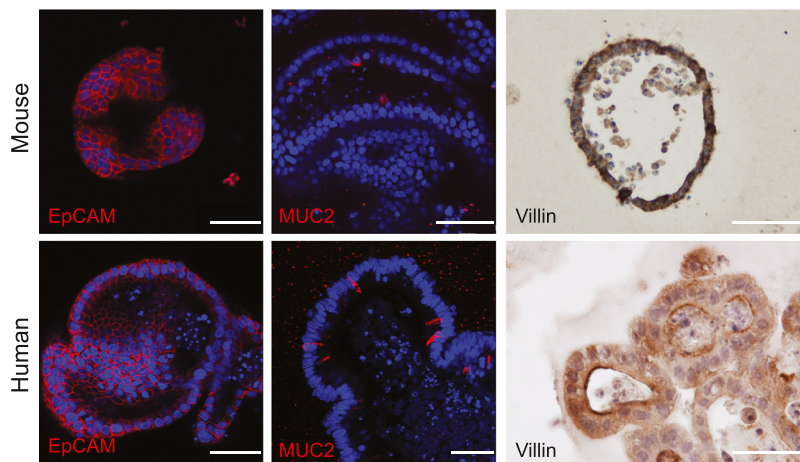**C****Adenocarcinoma**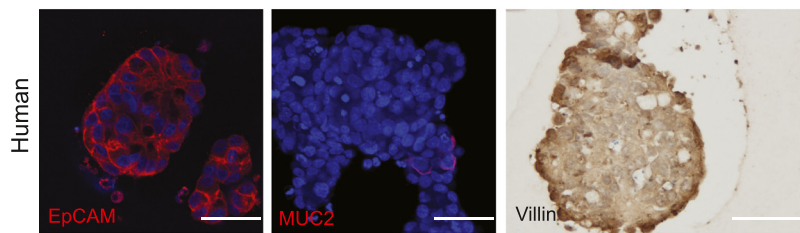

Supplement: MOESM5 [file 9552302]
